# Supplementary material
Source: PubMed Central journal article supplement (PMC3251930)
Supplement: supp_jc.2011-2233_11-2233_Supplemental_Material.pdf [file supp_jc.2011-2233_11-2233_Supplemental_Material.pdf]

1 Smith et al., Long-Duration Space Flight and Bed Rest Effects on Testosterone...

2 **Supplemental Material**

3

4 *LC-MS/MS method.* An Oasis HLB 96-well  $\mu$ Elution SPE (Waters Corporation, Milford, MA )  
5 plate was conditioned with 0.2 mL methanol followed by 0.2 mL deionized water. For  
6 determination of total testosterone, 20  $\mu$ L of internal standard (stable isotope-labeled testosterone-  
7 d3, 25 ng/mL in 50% methanol-water solution) was added, along with 100  $\mu$ L of 5%  $\text{H}_3\text{PO}_4$  water  
8 solution and 500  $\mu$ L deionized water, to the 100  $\mu$ L calibrator, control, and serum samples in a  
9 1.5-mL microcentrifuge vial with cap. The samples were vortexed and loaded onto the HLB SPE  
10 plate. For determination of bioavailable testosterone, 100  $\mu$ L cold (4–8°C) saturated ammonium  
11 sulfate water solution was added to 100  $\mu$ L calibrator, control, and serum samples. The samples  
12 were vortexed and centrifuged for 5 min at 13,500 RPM (18,779  $\times g$ ). The supernatant was  
13 transferred to another 1.5-mL microcentrifuge vial and the following were added: 20  $\mu$ L internal  
14 standard T-d3, 20  $\mu$ L 5%  $\text{H}_3\text{PO}_4$  and 500  $\mu$ L deionized water. The samples were vortexed and  
15 loaded onto the HLB SPE plate. The SPE plates were rinsed with 0.2 mL 5%  $\text{NH}_4\text{OH}$  water  
16 solution followed by 0.2 mL 50% methanol-water solution . The samples were eluted with 0.1  
17 mL 100% methanol to a 0.8-mL 96-well sample collection plate and the plate was covered for  
18 LC-MS/MS analysis. Ten microliters of the extracted sample was injected into the Ultra  
19 Performance (UP) LC-MS/MS system.

20

21 *LC-MS/MS Conditions.* The chromatographic separation was performed using a Waters Acquity  
22 UPLC system equipped with an autosampler, a binary pump manager, and a Waters Acquity  
23 UPLC BEHC18 analytical column (50  $\times$  2.1 mm, 1.7- $\mu$ m particle size) (Waters Corporation,  
24 Milford, MA). Mobile Phase A was deionized water (0.05% formic acid) and mobile phase B was  
25 acetonitrile (0.05% formic acid). The following gradient elution procedure with a flow rate of 2.5  
26 mL/min was used for each injection: 0 min of 50% B and held for 0.25 min; a linear increase to

27 80% B at 0.75 min and then up to 100% B in 0.25 min, held for 0.5 min; and then a linear return  
28 to the initial state. The total run time was 2 min. Injection volume was 10  $\mu$ L. Sample chamber  
29 temperature was 4°C and column chamber temperature was 30°C during the analysis. Mass  
30 detection and quantification of the total and bioavailable testosterone was carried out with a  
31 Quattro Micro™ API mass detector using an electrospray interface (Waters). Positive ions were  
32 monitored in the multiple reaction modes (MRM). The respective parent/product ion pair was  
33 289.3/109.0 m/z for testosterone and 292.3/109.0 m/z for testosterone-d3. The following  
34 parameters for the ion source were used: capillary voltage 3.5 kV, cone 30 V, and collision  
35 energy 25 eV. Dwell time was 0.3 sec, source temperature was 120°C, and desolvation  
36 temperature was 450°C. Argon was used as the collision gas. The whole UPLC-MS/MS system  
37 was controlled by MassLynx 4.1 software (Waters).

38

39 *Estimation of SHBG and Free Testosterone.* Free testosterone and SHBG were calculated based  
40 on a mathematical model developed by Vermeulen and colleagues (1). We developed a method  
41 from this model to estimate SHBG and FT using concentrations of TT and BT that can be  
42 determined by the LC-MS/MS, and an average concentration of albumin in human serum. The  
43 equation of testosterone in serum is described as:

Total Testosterone = Free T + Alb-bound T + SHBG-bound T

$$[TT] = [FT] + [AT] + [PT]$$

44  $[AT]/[FT] = \text{constant} = K_A[\text{Alb.}] = K_A(43\text{g/L})/69000 = 6.23188 \times 10^{-4} K_A$

45 Where 69000 = molecular weight of albumin, and the 43 g/L is average albumin concentration in  
46 human serum.

47  $[AT] = 6.23188 \times 10^{-4} K_A [FT],$

48  $[BT] = [FT] + [AT] = (1 + 6.23188 \times 10^{-4} K_A) [FT]$

49 Thus FT concentration can be calculated as:

$$50 \quad [FT] = [BT] / (1 + 6.23188 \times 10^{-4} K_A) \quad (1)$$

51 If [P] = free SHBG, and [PT] = testosterone bound SHBG, we can get an equation as

$$52 \quad [FT] + [P] \leftrightarrow [PT] \text{ or } [P] = [PT] / ([FT] K_S)$$

$$53 \quad [SHBG] = [P] + [PT] = [PT] / ([FT] [K_S]) + [PT] = [PT] \{1 / ([FT] K_S) + 1\}$$

54 Where [PT] = [TT] – [BT], and use equation (1) [FT] = [BT] / (1 + 6.23188 x 10<sup>-4</sup> K<sub>A</sub>)

55 Thus SHBG concentration can be calculated as:

$$56 \quad [SHBG] = ([TT] - [BT]) \{ (1 + 6.23188 \times 10^{-4} K_A) / (K_S [BT]) + 1 \} \quad (2)$$

57

58 We calculated SHBG concentrations in 6 serum samples in the College of American Pathologists

59 (CAP) 2010 inter-laboratory survey using concentrations of TT and BT that determined by LC-

60 MS/MS, and optimal association constants  $K_S = 2.5 \times 10^9$  L/mol and  $K_A = 2.45 \times 10^4$  L/mol (2, 3).

61 Compared to the mean values of SHBG concentrations in the CAP report, our estimated SHBG

62 results showed an average 10.3% deviation. Four of the 6 samples had deviations <10%.

63

64 *Accuracy and Precision of the LC-MS/MS method.* Three levels (75, 300, and 1500 ng/dL) of

65 controls of testosterone were used for the evaluation of intra-assay and inter-assay % CVs. The

66 controls were prepared with spiking testosterone in a 1% BSA water solution. The intra-assay

67 CVs ( $n=6$ ) were 8.7%, 3.5%, and 1.7%, and inter-assay CVs ( $n=18$ ) were 7.1%, 9.7%, and

68 10.9%, respectively. The linear range of the calibration curve for testosterone using this method

69 was 20–5000 ng/dL (0.69–173.35 nmol/L). The lower limit of quantification (LLOQ) was 20

70 ng/dL (0.69 nmol/L). We also analyzed 6 serum samples using mass spectrometry in a CAP 2010  
71 inter-laboratory survey. Compared to the values of total testosterone in the CAP report ( $n=6$ ), our  
72 study results showed an average 10.9% deviation. Four of the 6 samples had deviations <10%.

73

#### 74 **REFERENCES**

75

- 76 1. **Vermeulen A, Verdonck L, Kaufman JM** 1999 A critical evaluation of simple  
77 methods for the estimation of free testosterone in serum. *J Clin Endocrinol Metab*  
78 84:3666-3672
- 79 2. **Giton F, Urien S, Born C, Tichet J, Guechot J, Callebert J, Bronsard F,**  
80 **Raynaud JP, Fiet J** 2007 Determination of bioavailable testosterone [non sex  
81 hormone binding globulin (SHBG)-bound testosterone] in a population of healthy  
82 French men: influence of androstenediol on testosterone binding to SHBG. *Clin*  
83 *Chem* 53:2160-2168
- 84 3. **de Ronde W, van der Schouw YT, Pols HA, Gooren LJ, Muller M, Grobbee**  
85 **DE, de Jong FH** 2006 Calculation of bioavailable and free testosterone in men: a  
86 comparison of 5 published algorithms. *Clin Chem* 52:1777-1784  
87  
88
